# Supplementary material for: Dehydration kinetics of the synthesis of high-nickel cathode materials used in lithium ion batteries
Source: Royal Society of Chemistry journal article supplement (doi:10.1039/d3ta07579f), 2024-01-01
Supplement: d3ta07579f1.pdf [file d3ta07579f1.pdf]

## **Supplementary Information**

### **Dehydration kinetics of the synthesis of high-nickel cathode materials used in lithium ion batteries**

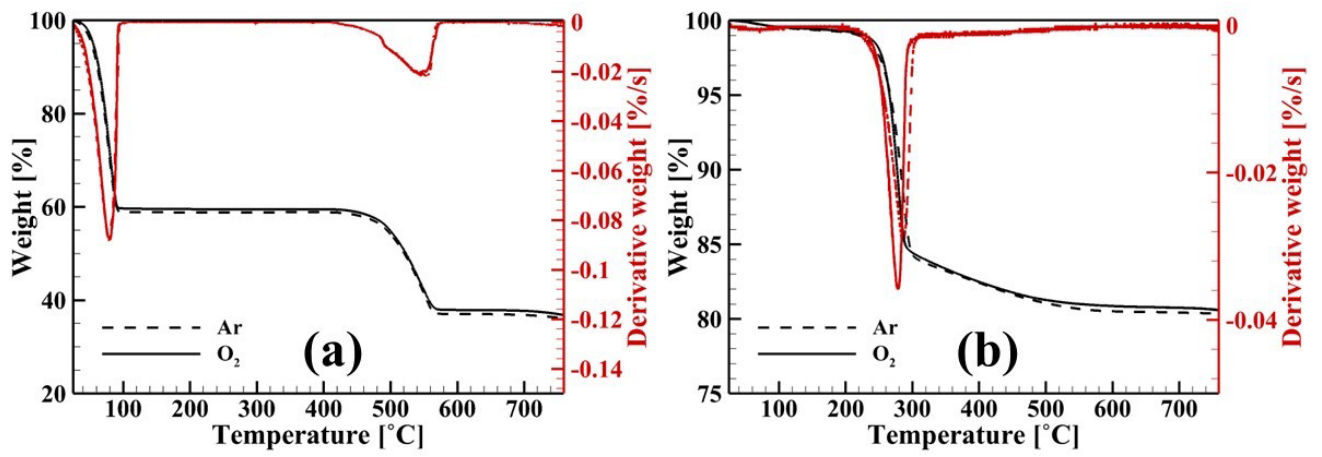

**Fig. S1.** The comparison of TGA measurement in the different atmospheres of Ar and O<sub>2</sub> for (a) LiOH · H<sub>2</sub>O and (b) Ni<sub>x</sub>Co<sub>y</sub>Mn<sub>z</sub>(OH)<sub>2</sub> precursor.

**Table S1.** The elemental composition of  $\text{Ni}_x\text{Co}_y\text{Mn}_z(\text{OH})_2$  measured by ICP-OES.

| <b>Element [%]</b> | <b>Ni</b> | <b>Co</b> | <b>Mn</b> |
|--------------------|-----------|-----------|-----------|
| <b>ICP-OES</b>     | 88.169    | 5.115     | 6.716     |

**Table S2.** The materials and space groups that are expressed in the subscripts of crystal planes.

| <b>Subscripts</b> | <b>Materials</b>              | <b>Space group</b> |
|-------------------|-------------------------------|--------------------|
| <b>L, C</b>       | Lithium hydroxide monohydrate | C 1 2/m 1          |
| <b>L, P</b>       | Lithium hydroxide             | P 4/n m m          |
| <b>L, F</b>       | Lithium oxide                 | F m -3 m           |
| <b>N, P</b>       | Transition metal hydroxide    | P -3 m 1           |
| <b>N, R</b>       | Transition metal oxide        | R -3 m             |

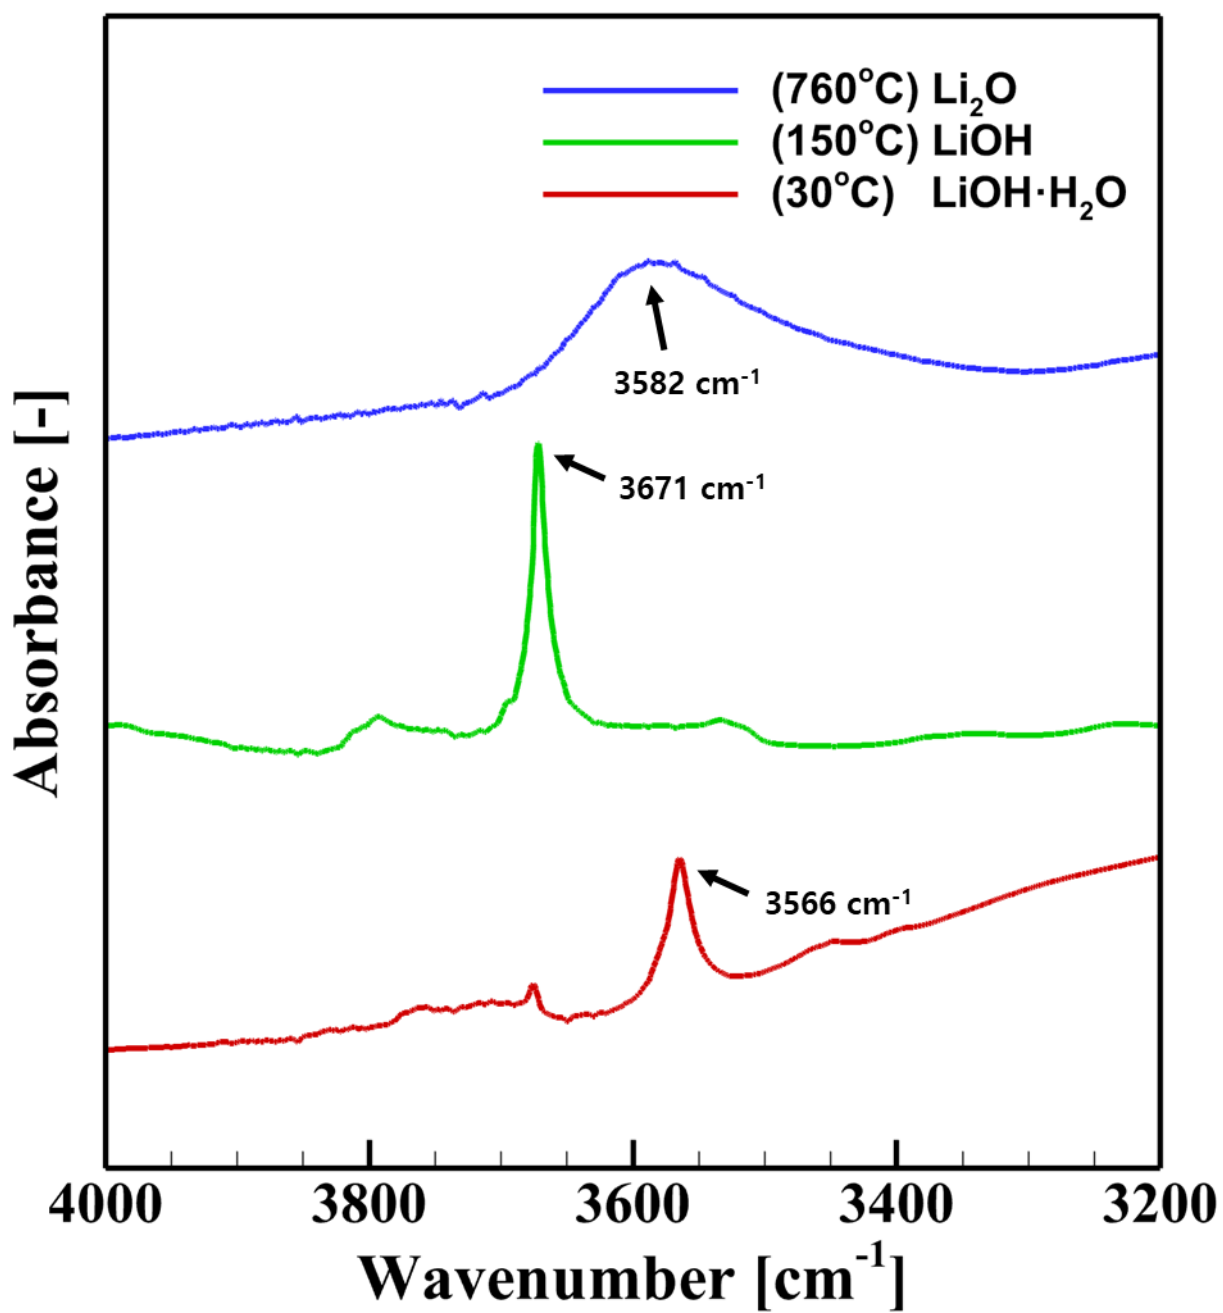

Fig. S2. IR spectrum measured by in-situ DRIFT at the temperature of  $30^\circ\text{C}$ ,  $150^\circ\text{C}$  and  $760^\circ\text{C}$ .

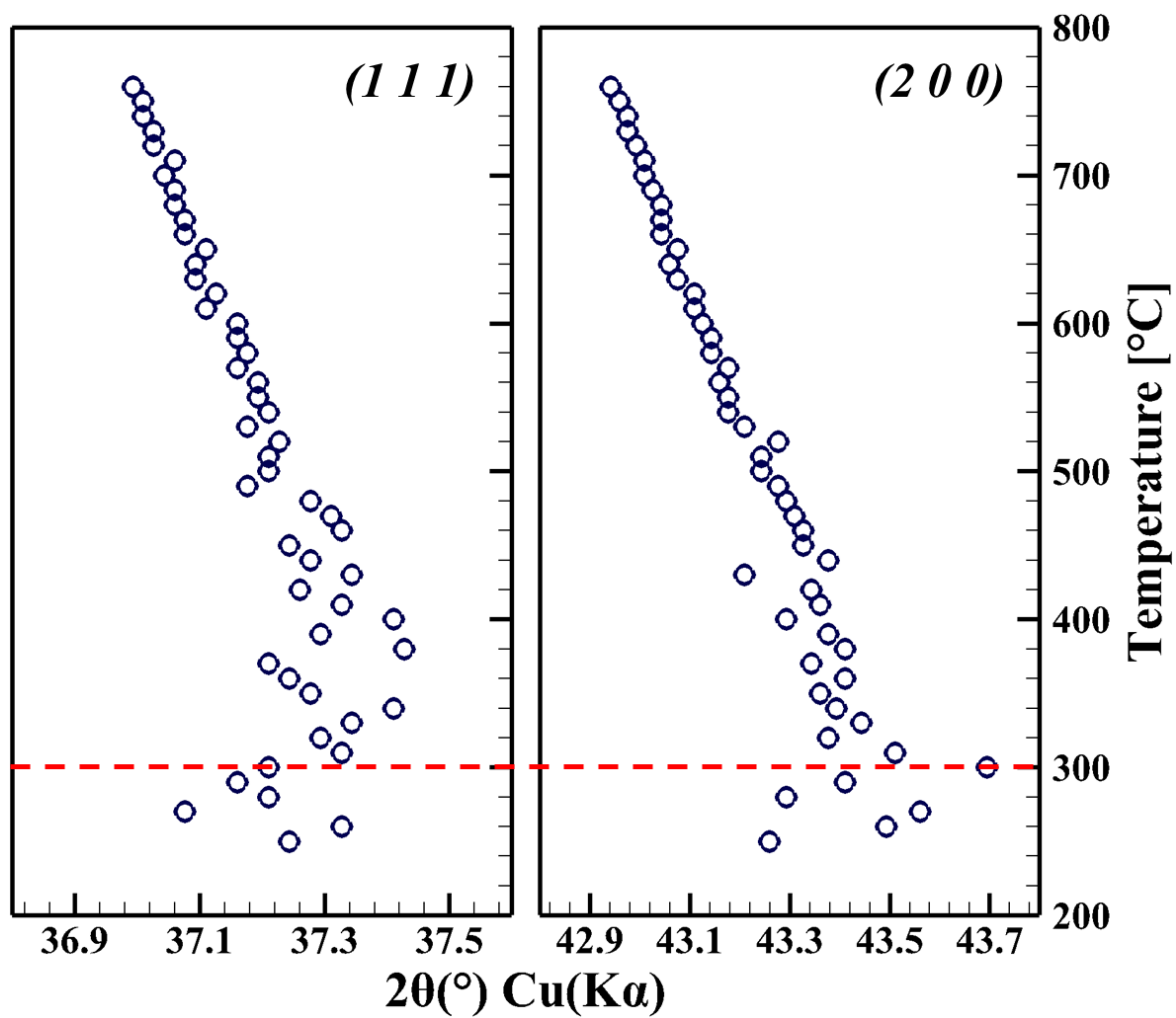

**Fig. S3.** A schematic diagram for the main peak (111) and (200) shifts in the in-situ XRD measurements of the  $\text{Ni}_x\text{Co}_y\text{Mn}_z(\text{OH})_2$  precursor.

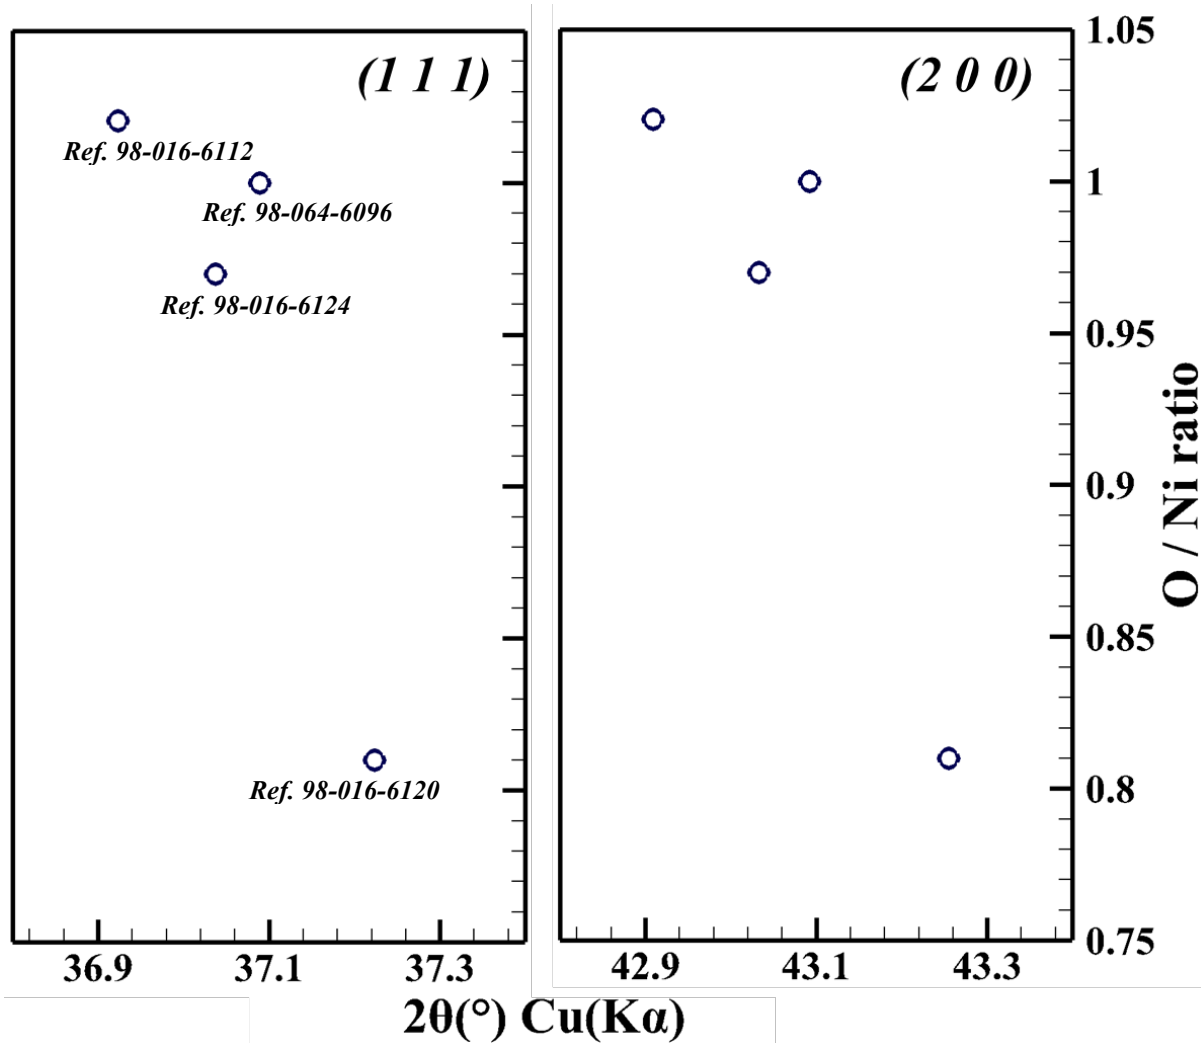

Fig. S4. A schematic diagram for the main peak (111) and (200) shifts with respect to O/Ni ratio of  $\text{NiO}_x$  based on reference.

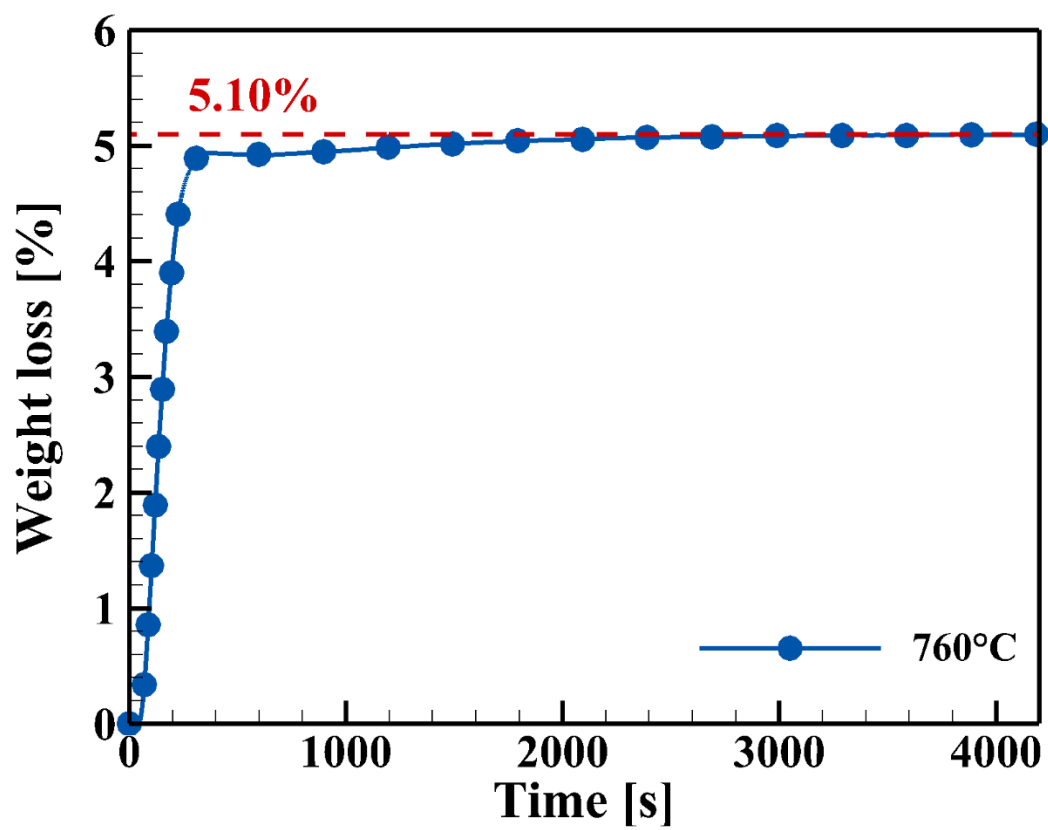

Fig. S5. TGA results at the isothermal temperature of 760°C for  $R_{2,2}$ : decomposition of  $Ni_xCo_yMn_zO_{1.25}$ .

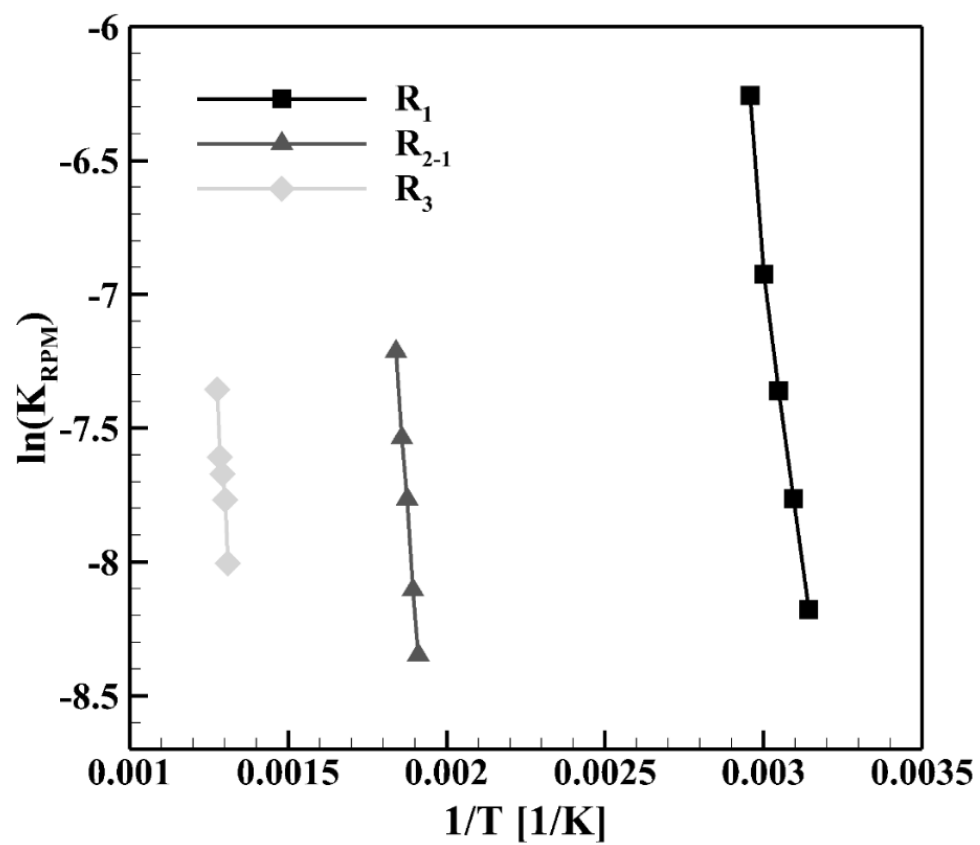

Fig. S6. Arrhenius curves for the dehydration reactions of the precursors.
